# Supplementary material
Source: PubMed Central journal article supplement (PMC4808456)
Supplement: NIHMS754277-supplement-1.pdf [file NIHMS754277-supplement-1.pdf]

**Figure 3. The proportion satisfying each reliability criterion for Cochrane (n=15) vs. non-Cochrane systematic reviews (n=32)**

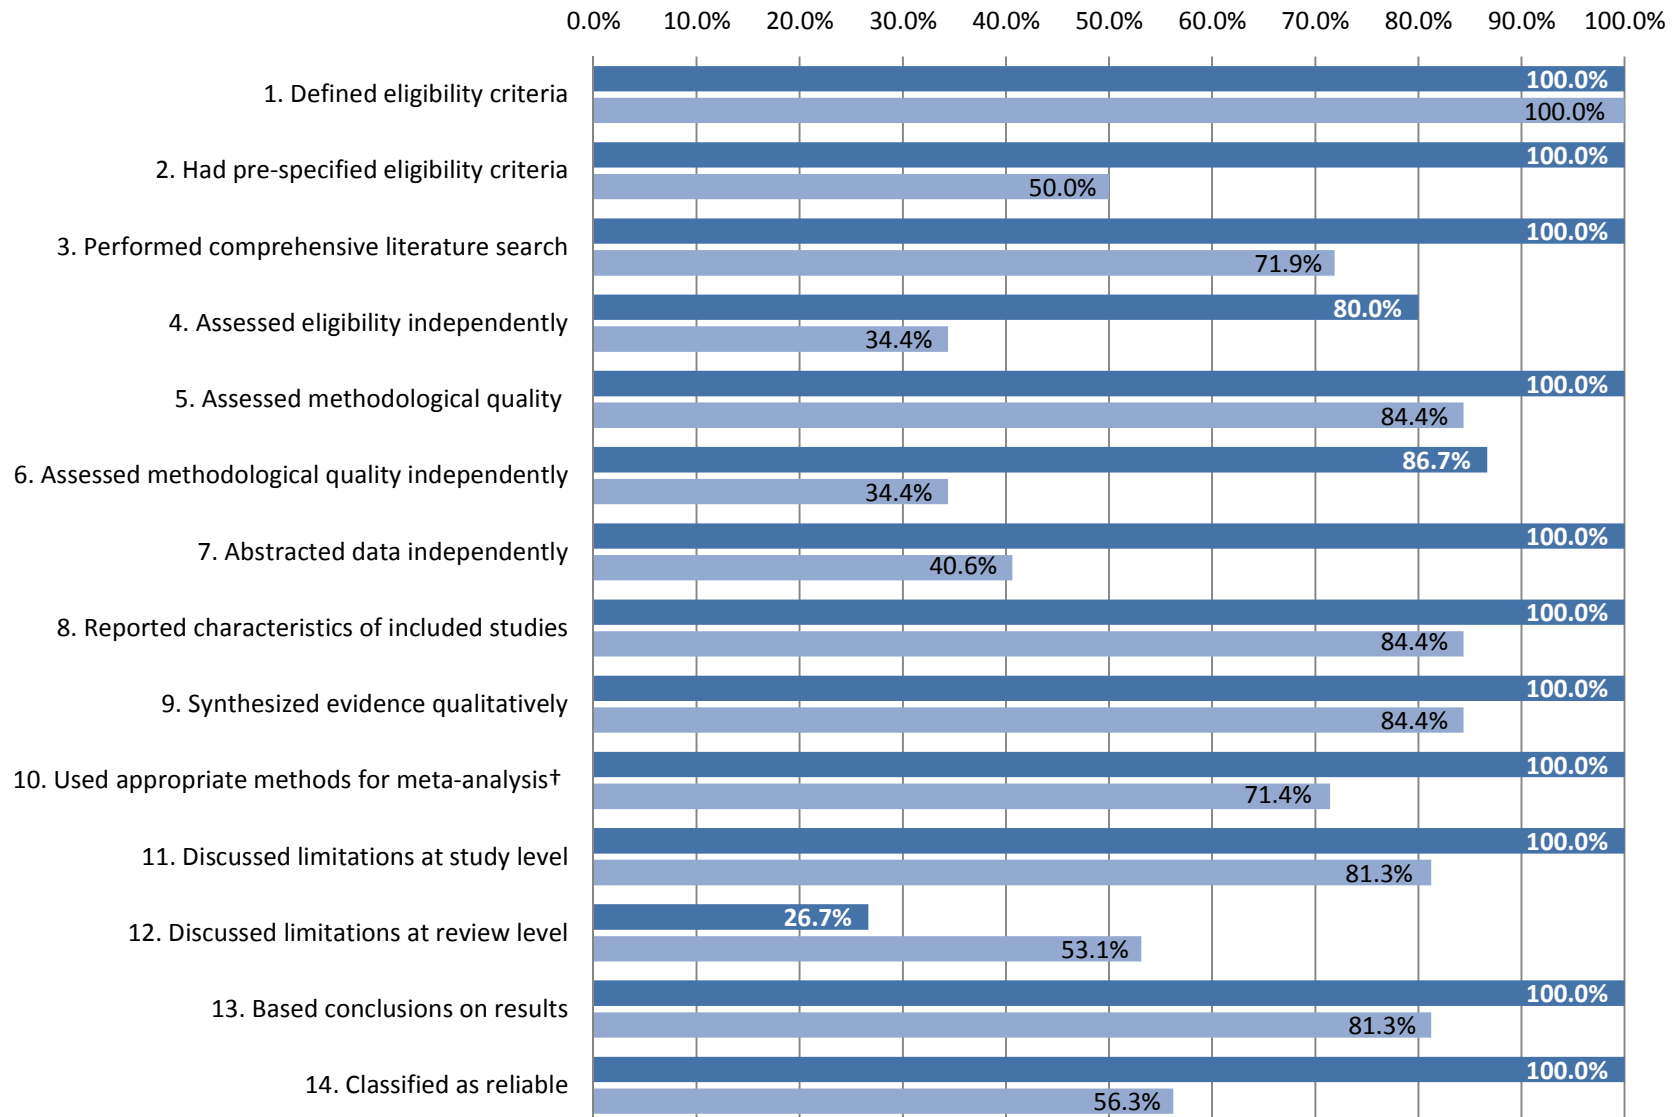

†The denominator was 8 Cochrane and 14 non-Cochrane systematic reviews with at least one meta-analysis

■ Cochrane systematic reviews    ■ Non-Cochrane systematic reviews
