# Supplementary material
Source: PubMed Central journal article supplement (PMC4808456)
Supplement: NIHMS754277-supplement-2.pdf [file NIHMS754277-supplement-2.pdf]

Figure 4. Inclusion of randomized controlled trials in systematic reviews of anti-vascular endothelial growth factor treatments for age-related macular degeneration

|                                      |                           |                                                    |                     | Systematic reviews of anti-vascular endothelial growth factor treatments for age-related macular degeneration (n = 10) |                        |                        |                        |               |              |                         |                         |                         |                                    |                         |
|--------------------------------------|---------------------------|----------------------------------------------------|---------------------|------------------------------------------------------------------------------------------------------------------------|------------------------|------------------------|------------------------|---------------|--------------|-------------------------|-------------------------|-------------------------|------------------------------------|-------------------------|
| Randomized controlled trial (RCT) ID | Date of first publication | Interventions compared                             | Length of follow-up | Author Year                                                                                                            | Takeda 2007            | Colquitt 2008          | Vedula 2008 (Cochrane) | Schouten 2009 | Ziemsse 2009 | Schmucker 2010          | Schmucker 2011          | Schmucker 2012          | Cheng 2012                         | Jiang 2014              |
|                                      |                           |                                                    |                     | Date of search                                                                                                         | SEPTEMBER 2006         | SEPTEMBER 2006         | FEBRUARY 2008          | MARCH 2008    | JULY 2008    | AUGUST 2009             | AUGUST 2009             | MAY 2011                | OCTOBER 2011                       | MARCH 2013              |
|                                      |                           |                                                    |                     | Interventions assessed                                                                                                 | PEGAPTANIB RANIBIZUMAB | PEGAPTANIB RANIBIZUMAB | PEGAPTANIB RANIBIZUMAB | BEVACIZUMAB   | BEVACIZUMAB  | RANIBIZUMAB BEVACIZUMAB | RANIBIZUMAB BEVACIZUMAB | RANIBIZUMAB BEVACIZUMAB | PEGAPTANIB RANIBIZUMAB BEVACIZUMAB | RANIBIZUMAB BEVACIZUMAB |
|                                      |                           |                                                    |                     | Minimum follow-up                                                                                                      | 12 months              | 12 months              | 12 months              | None          | None         | None                    | None                    | 12 months               | 12 months                          | 12 months               |
| 1. VISION                            | Dec 2004                  | Pegaptanib vs sham                                 | > 1 year            |                                                                                                                        | +                      | +                      | +                      |               |              |                         |                         |                         | +                                  |                         |
| 2. Heier                             | Feb 2006                  | Ranibizumab vs usual care                          | 6 months            |                                                                                                                        |                        |                        |                        |               |              | +                       | +                       |                         |                                    |                         |
| 3. MARINA                            | Oct 2006                  | Ranibizumab vs sham                                | > 1 year            |                                                                                                                        | +                      | +                      | +                      |               |              | +                       | +                       | +                       | +                                  | +                       |
| 4. ANCHOR                            | Oct 2006                  | Ranibizumab vs PDT                                 | > 1 year            |                                                                                                                        | +                      | +                      | +                      |               |              | +                       | +                       | +                       | +                                  | +                       |
| 5. FOCUS                             | Nov 2006                  | Ranibizumab+PDT vs PDT                             | > 1 year            |                                                                                                                        | +                      | +                      | +                      |               |              | -                       | -                       | -                       | +                                  | +                       |
| 6. Lazic                             | Jan 2007                  | Bevacizumab vs PDT vs both                         | 3 months            |                                                                                                                        |                        |                        |                        | +             | +            | +                       | +                       |                         |                                    |                         |
| 7. Hahn                              | Jul 2007                  | Bevacizumab vs PDT+triamcinolone                   | 3 months            |                                                                                                                        |                        |                        |                        | +             | -            | +                       | +                       |                         |                                    |                         |
| 8. Bashur                            | Oct 2007                  | Bevacizumab vs PDT                                 | 6 months            |                                                                                                                        |                        |                        |                        | +             | +            | +                       | +                       |                         |                                    |                         |
| 9. PIER                              | Feb 2008                  | Ranibizumab vs sham                                | > 1 year            |                                                                                                                        |                        | +                      |                        |               |              | +                       | +                       | +                       | +                                  | +                       |
| 10. Weigert                          | Mar 2008                  | Bevacizumab vs PDT+triamcinolone                   | 1 year              |                                                                                                                        |                        |                        |                        |               | +            | +                       | +                       | +                       | -                                  | -                       |
| 11. SAILOR                           | Sep 2009                  | 0.3 mg vs 0.5 mg ranibizumab                       | 1 year              |                                                                                                                        |                        |                        |                        |               |              |                         |                         | +                       |                                    | +                       |
| 12. Costagliola                      | Dec 2009                  | Bevacizumab vs PDT+bevacizumab                     | 1 year              |                                                                                                                        |                        |                        |                        |               |              |                         |                         | +                       |                                    | -                       |
| 13. Subramanian                      | Dec 2009                  | Ranibizumab vs bevacizumab                         | 1 year              |                                                                                                                        |                        |                        |                        |               |              |                         |                         | +                       |                                    | +                       |
| 14. ABC                              | Jun 2010                  | Bevacizumab vs standard care                       | 1 year              |                                                                                                                        |                        |                        |                        |               |              |                         |                         | +                       | +                                  | -                       |
| 15. CATT                             | April 2011                | Ranibizumab vs bevacizumab                         | > 1 year            |                                                                                                                        |                        |                        |                        |               |              |                         |                         | +                       |                                    | +                       |
| 16. Biswas                           | May 2011                  | Ranibizumab vs bevacizumab                         | > 1 year            |                                                                                                                        |                        |                        |                        |               |              |                         |                         | +                       |                                    | -                       |
| 17. EXCITE                           | May 2011                  | 0.3 mg quarterly vs. monthly vs 0.5 mg ranibizumab | > 1 year            |                                                                                                                        |                        |                        |                        |               |              |                         |                         | +                       |                                    | +                       |

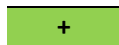

RCT included in the SR

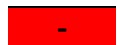

RCT eligible, but not included in SR

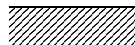

RCT not eligible for the SR

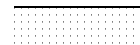

RCT published after search date of the SR
