# Supplementary material
Source: PubMed Central journal article supplement (PMC4808456)
Supplement: NIHMS754277-supplement-3.pdf [file NIHMS754277-supplement-3.pdf]

**Appendix 1. Reliability assessments for 47 systematic reviews of age-related macular degeneration**

| Study ID                                                              | Publication Source (Language) | Types of interventions evaluated | Number of included studies | Direction of main finding | Defined criteria for selection of studies | Comprehensive searches for eligible studies | Assessment of risk of bias in included studies | Appropriate statistical methods for meta-analysis | Concordance between results and conclusions |
|-----------------------------------------------------------------------|-------------------------------|----------------------------------|----------------------------|---------------------------|-------------------------------------------|---------------------------------------------|------------------------------------------------|---------------------------------------------------|---------------------------------------------|
| <b>Reviews classified as reliable based on five criteria (n = 33)</b> |                               |                                  |                            |                           |                                           |                                             |                                                |                                                   |                                             |
| Cheng 2012                                                            | Journal (English)             | Anti-VEGFs                       | 6                          | Effective                 | Yes                                       | Yes                                         | Yes                                            | Yes                                               | Yes                                         |
| Chong 2007                                                            | Journal (English)             | Dietary supplements              | 12                         | Inconclusive              | Yes                                       | Yes                                         | Yes                                            | Yes                                               | Yes                                         |
| Colquitt 2008                                                         | Agency (English)              | Anti-VEGFs                       | 6                          | Effective                 | Yes                                       | Yes                                         | Yes                                            | Not applicable                                    | Yes                                         |
| Eandi 2008                                                            | Cochrane (English)            | Submacular surgery               | 1                          | Inconclusive              | Yes                                       | Yes                                         | Yes                                            | Not applicable                                    | Yes                                         |
| Evans 2008                                                            | Journal (English)             | Dietary supplements              | 10                         | Inconclusive              | Yes                                       | Yes                                         | Yes                                            | Yes                                               | Yes                                         |
| Evans 2013                                                            | Cochrane (English)            | Dietary supplements              | 2                          | Inconclusive              | Yes                                       | Yes                                         | Yes                                            | Not applicable                                    | Yes                                         |
| Evans 2012                                                            | Cochrane (English)            | Dietary supplements              | 4                          | Ineffective               | Yes                                       | Yes                                         | Yes                                            | Yes                                               | Yes                                         |
| Evans 2010                                                            | Cochrane (English)            | Other                            | 14                         | Inconclusive              | Yes                                       | Yes                                         | Yes                                            | Yes                                               | Yes                                         |
| Evans 2012                                                            | Cochrane (English)            | Dietary supplements              | 13                         | Effective                 | Yes                                       | Yes                                         | Yes                                            | Yes                                               | Yes                                         |
| Gehlbach 2012                                                         | Cochrane (English)            | Statins                          | 2                          | Inconclusive              | Yes                                       | Yes                                         | Yes                                            | Not applicable                                    | Yes                                         |
| Geltzer 2013                                                          | Cochrane (English)            | Other                            | 3                          | Ineffective               | Yes                                       | Yes                                         | Yes                                            | Not applicable                                    | Yes                                         |
| Giansanti 2009                                                        | Cochrane (English)            | Submacular surgery               | 3                          | Ineffective               | Yes                                       | Yes                                         | Yes                                            | Yes                                               | Yes                                         |
| Hodge 2007                                                            | Journal (English)             | Dietary supplements              | 2                          | Inconclusive              | Yes                                       | Yes                                         | Yes                                            | Not applicable                                    | Yes                                         |
| Husereau 2002                                                         | Agency (English)              | Photodynamic therapy             | 3                          | Effective                 | Yes                                       | Yes                                         | Yes                                            | Not applicable                                    | Yes                                         |
| Jiang 2014                                                            | Journal (English)             | Anti-VEGFs                       | 8                          | Effective                 | Yes                                       | Yes                                         | Yes                                            | Yes                                               | Yes                                         |
| Lawrenson 2012                                                        | Cochrane (English)            | Dietary supplements              | 0                          | Inconclusive              | Yes                                       | Yes                                         | Not applicable                                 | Not applicable                                    | Yes                                         |
| Lee 2008                                                              | Journal (English)             | Health or rehabilitation         | not reported               | Effective                 | Yes                                       | Yes                                         | Yes                                            | Not applicable                                    | Yes                                         |
| Meads 2004                                                            | Journal (English)             | Photodynamic therapy             | 2                          | Inconclusive              | Yes                                       | Yes                                         | Yes                                            | Yes                                               | Yes                                         |
| Meads 2003                                                            | Agency (English)              | Photodynamic therapy             | 2                          | Inconclusive              | Yes                                       | Yes                                         | Yes                                            | Yes                                               | Yes                                         |
| Oliva 2002                                                            | Agency (Spanish)              | Photodynamic therapy             | 2                          | Effective                 | Yes                                       | Yes                                         | Yes                                            | Not applicable                                    | Yes                                         |
| Parodi 2009                                                           | Cochrane (English)            | Laser photocoagulation           | 9                          | Inconclusive              | Yes                                       | Yes                                         | Yes                                            | Yes                                               | Yes                                         |
| Reddy 2006                                                            | Cochrane (English)            | Other                            | 1                          | Ineffective               | Yes                                       | Yes                                         | Yes                                            | Not applicable                                    | Yes                                         |
| Schmucker 2012                                                        | Journal (English)             | Anti-VEGFs                       | 11                         | Ineffective               | Yes                                       | Yes                                         | Yes                                            | Yes                                               | Yes                                         |
| Schmucker 2010                                                        | Journal (English)             | Anti-VEGFs                       | 33                         | Ineffective               | Yes                                       | Yes                                         | Yes                                            | Not applicable                                    | Yes                                         |
| Schmucker 2011                                                        | Journal (English)             | Anti-VEGFs                       | 25                         | Inconclusive              | Yes                                       | Yes                                         | Yes                                            | Yes                                               | Yes                                         |
| Schouten 2009                                                         | Journal (English)             | Anti-VEGFs                       | 26                         | Effective                 | Yes                                       | Yes                                         | Yes                                            | Not applicable                                    | Yes                                         |
| Takeda 2007                                                           | Journal (English)             | Anti-VEGFs                       | 5                          | Effective                 | Yes                                       | Yes                                         | Yes                                            | Not applicable                                    | Yes                                         |
| Vedula 2008                                                           | Cochrane (English)            | Anti-VEGFs                       | 5                          | Effective                 | Yes                                       | Yes                                         | Yes                                            | Yes                                               | Yes                                         |
| Virgili 2007                                                          | Cochrane (English)            | Laser photocoagulation           | 15                         | Effective                 | Yes                                       | Yes                                         | Yes                                            | Yes                                               | Yes                                         |
| Wild 2009                                                             | Journal (German)              | Other                            | 2                          | Ineffective               | Yes                                       | Yes                                         | Yes                                            | Not applicable                                    | Yes                                         |
| Williams 2014                                                         | Cochrane (English)            | Other                            | 0                          | Inconclusive              | Yes                                       | Yes                                         | Not applicable                                 | Not applicable                                    | Yes                                         |
| Wormald 2005                                                          | Cochrane (English)            | Photodynamic therapy             | 6                          | Effective                 | Yes                                       | Yes                                         | Yes                                            | Yes                                               | Yes                                         |
| Ziemssen 2009                                                         | Journal (English)             | Anti-VEGFs                       | 33                         | Effective                 | Yes                                       | Yes                                         | Yes                                            | Not applicable                                    | Yes                                         |

| Study ID                                                                | Publication Source (Language) | Types of interventions evaluated | Number of included studies | Direction of main finding | Defined criteria for selection of studies | Comprehensive searches for eligible studies | Assessment of risk of bias in included studies | Appropriate statistical methods for meta-analysis | Concordance between results and conclusions |
|-------------------------------------------------------------------------|-------------------------------|----------------------------------|----------------------------|---------------------------|-------------------------------------------|---------------------------------------------|------------------------------------------------|---------------------------------------------------|---------------------------------------------|
| <b>Reviews classified as unreliable based on five criteria (n = 14)</b> |                               |                                  |                            |                           |                                           |                                             |                                                |                                                   |                                             |
| Brown 2008                                                              | Agency (English)              | Anti-VEGFs                       | 12                         | Effective                 | Yes                                       | Yes                                         | Yes                                            | Can't tell                                        | Yes                                         |
| Chuo 2007                                                               | Journal (English)             | Statins                          | 8                          | Inconclusive              | Yes                                       | Yes                                         | No                                             | Yes                                               | Yes                                         |
| Cruess 2009                                                             | Journal (English)             | Photodynamic therapy             | 36                         | Effective                 | Yes                                       | No                                          | No                                             | Not applicable                                    | No                                          |
| Falkner 2007                                                            | Journal (English)             | Submacular surgery               | 88                         | Effective                 | Yes                                       | No                                          | Yes                                            | No                                                | No                                          |
| Haute 2001                                                              | Agency (French)               | Multiple treatments              | not reported               | Effective                 | Yes                                       | Yes                                         | Yes                                            | Not applicable                                    | Can't tell                                  |
| Hooper 2008                                                             | Journal (English)             | Health or rehabilitation         | 32                         | Inconclusive              | Yes                                       | No                                          | Yes                                            | Not applicable                                    | Yes                                         |
| Ip 2008                                                                 | Journal (English)             | Anti-VEGFs                       | 54                         | Effective                 | Yes                                       | No                                          | Yes                                            | Not applicable                                    | Yes                                         |
| Lanzetta 2013                                                           | Journal (English)             | Anti-VEGFs                       | 7                          | Effective                 | Yes                                       | No                                          | No                                             | Not applicable                                    | No                                          |
| Mitchell 2011                                                           | Journal (English)             | Anti-VEGFs                       | 20                         | Inconclusive              | Yes                                       | No                                          | No                                             | Not applicable                                    | Yes                                         |
| Oliva 2009                                                              | Agency (Spanish)              | Multiple treatments              | 6                          | Effective                 | Yes                                       | Yes                                         | Yes                                            | Can't tell                                        | Yes                                         |
| Sin 2013                                                                | Journal (English)             | Health or rehabilitation         | not reported               | Effective                 | Yes                                       | No                                          | No                                             | Not applicable                                    | Can't tell                                  |
| Vishwanathan 2013                                                       | Journal (English)             | Dietary supplements              | 10                         | Inconclusive              | Yes                                       | No                                          | Yes                                            | Not applicable                                    | Yes                                         |
| Zhang 2010                                                              | Journal (Chinese)             | Dietary supplements              | 9                          | Effective                 | Yes                                       | Yes                                         | Yes                                            | No                                                | No                                          |
| Zhou 2012                                                               | Journal (Chinese)             | Anti-VEGFs                       | 7                          | Effective                 | Yes                                       | No                                          | Yes                                            | Yes                                               | Yes                                         |

Examples of inappropriate statistical methods included combining results from different study designs (e.g., cohort and case-control studies), analyzed within group data only (i.e., not using between group estimates), and using case-control studies to assess incidence
